# Supplementary material for: Altered genomic methylation promotes Staphylococcus aureus persistence in hospital environment
Source: PubMed Central journal article supplement — Nat Commun. 2024 Nov 7;15:9619. doi: 10.1038/s41467-024-54033-3 (PMC11544029; doi:10.1038/s41467-024-54033-3), 2024-11-07
Supplement: 41467_2024_54033_MOESM3_ESM.pdf [file 41467_2024_54033_MOESM3_ESM.pdf]

## **Description of Additional supplementary files**

**Supplementary data 1.** MLST, SCCmec , Agr typing and NGS sequence details of NICU isolates.

**Supplementary data 2.** Colonization surveillance and clinical culture status of NICU isolates.

**Supplementary data 3.** Minimum inhibitory concentration (MIC) of 17 antibiotics against NICU isolates

**Supplementary data 4.** agr mutations in NICU subclones

**Supplementary data 5.** Patients information and clinical culture status of COVID-19 pneumonia patients

**Supplementary data 6.** 14 Antibiotics susceptibility of COVID19 pneumonia isolates

**Supplementary data 7.** Number of isolates and percentages by EA-Agr, Agr positive and Agr negative in hospital and skin *S. aureus* isolates

**Supplementary data 8.** PacBio SMRT sequencing

**Supplementary data 9.** Relevant modified motifs detected in hospital isolates by PacBio SMRT(Sequel) sequencing

**Supplementary data 10.** Differential 5mC methylation positions in Agr-positive and EA-Agr as determined by EM-seq

**Supplementary data 11.** Methylase list and expressions in outbreak subclones by RNA sequencing

**Supplementary data 12.** Primers used in this study
